# Supplementary material
Source: publisher figshare collection journal article supplement (https://acs.figshare.com/ndownloader/files/7423618)
Supplement: Supplementary file 1 [file 7423618]

# Supporting Information

## Synthesis of Highly Crystalline NH<sub>2</sub>-MIL-125 (Ti) with S-Shaped Water Isotherms for Adsorption Heat Transformation

Muhammad Sohail,<sup>†,‡</sup> Yang-No Yun,<sup>†</sup> Eunkyung Lee,<sup>§</sup> Sang Kyum Kim,<sup>§</sup> Kanghee Cho,<sup>§</sup> Jong-Nam Kim,<sup>§</sup> Tae Woo Kim,<sup>†</sup> Jong-Ho Moon,<sup>†</sup> Hyunuk Kim<sup>\*,†,‡</sup>

<sup>†</sup>Energy Materials Laboratory and <sup>§</sup>Green Fuel Laboratory and <sup>†</sup>Greenhouse Gas Laboratory, Korea Institute of Energy Research, 152 Gajeong-ro, Yuseong-gu, Daejeon 34129, Republic of Korea

<sup>‡</sup>Advanced Energy Technology, University of Science and Technology, 217 Gajeong-ro, Yuseong-gu, Daejeon 34113, Republic of Korea

E-mail: hyunuk@kier.re.kr

### Materials

Terephthalic acid (H<sub>2</sub>BDC), 2-aminoterephthalic acid (NH<sub>2</sub>-BDC) (99% purities each) and titanium butoxide, titanium isopropoxide (97% purities each) were purchased from TCI. Anhydrous methanol (MeOH) and anhydrous N,N-dimethylformamide (with 99.8% purities each) were purchased from Sigma Aldrich. These chemicals were used without any further purification. The nitrogen gas was of ultra-high purity (99.999%).

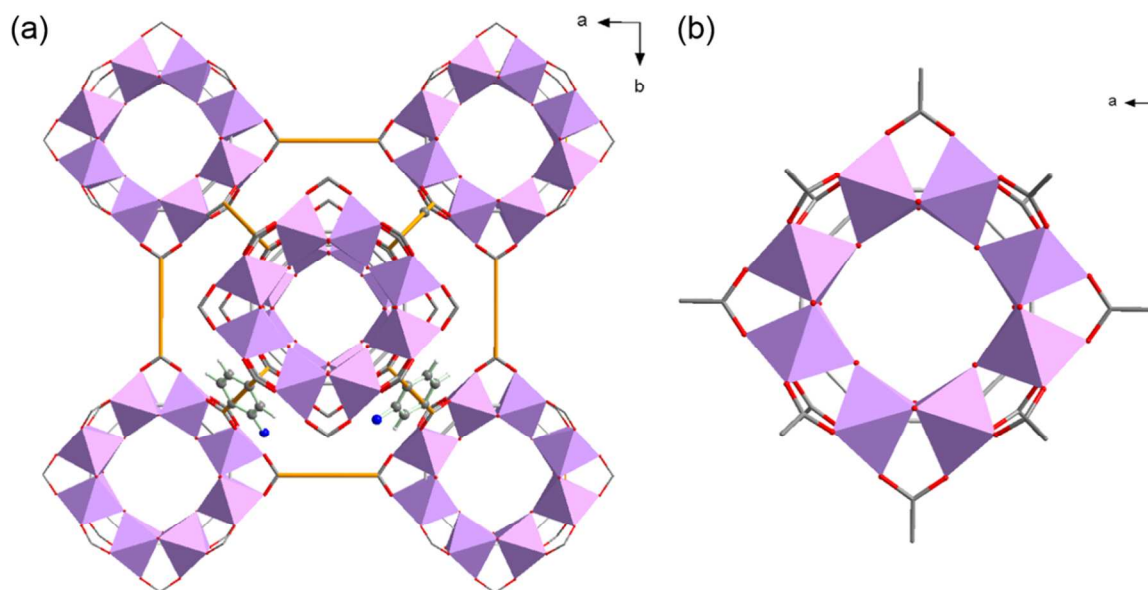

**Figure S1.** Polyhedral structures of NH<sub>2</sub>-MIL-125 along the *c* axis

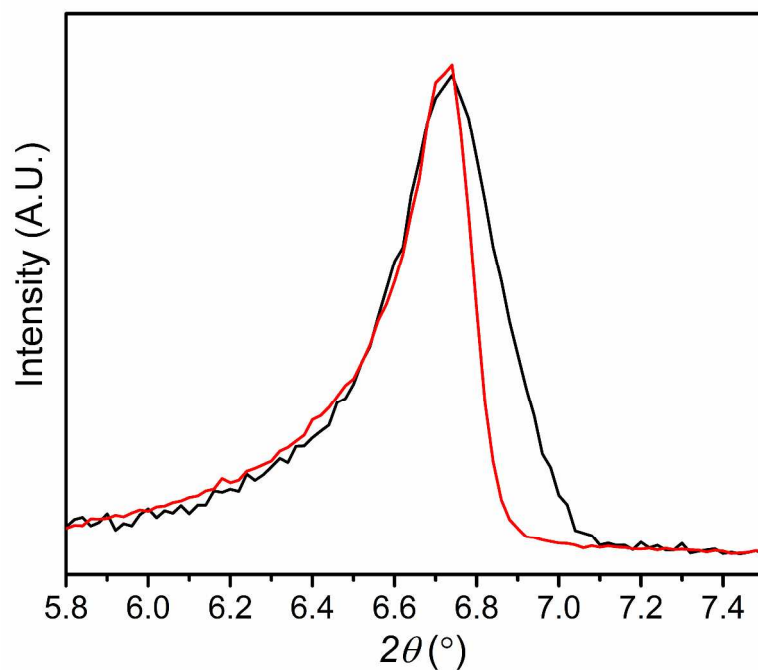

**Figure S2.** Normalized powder XRD profiles of NH<sub>2</sub>-MIL-125 synthesized using Ti(BuO)<sub>4</sub> (red line) and Ti(*i*PrO)<sub>4</sub> (black line) by a reflux method.

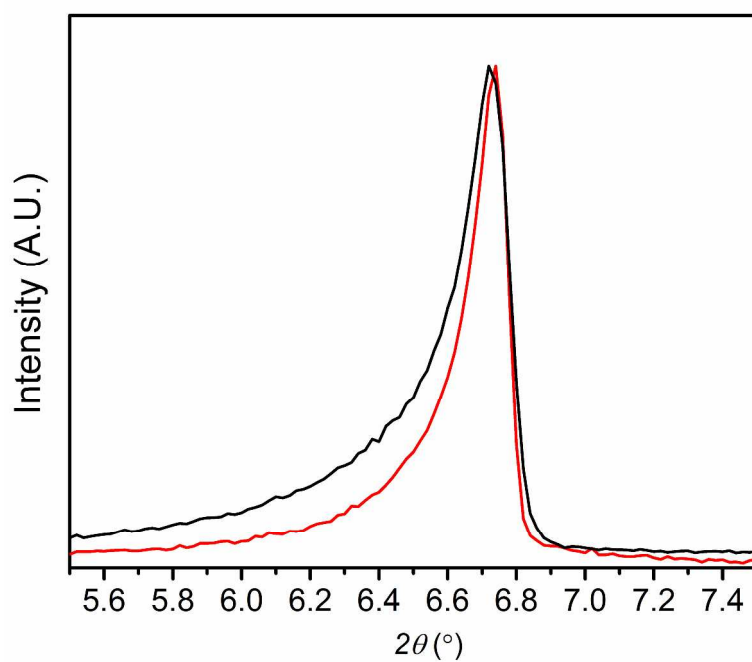

**Figure S3.** Normalized powder XRD profiles of NH<sub>2</sub>-MIL-125 synthesized using Ti(BuO)<sub>4</sub> (red line) and Ti(*i*PrO)<sub>4</sub> (black line) by a solvothermal method.

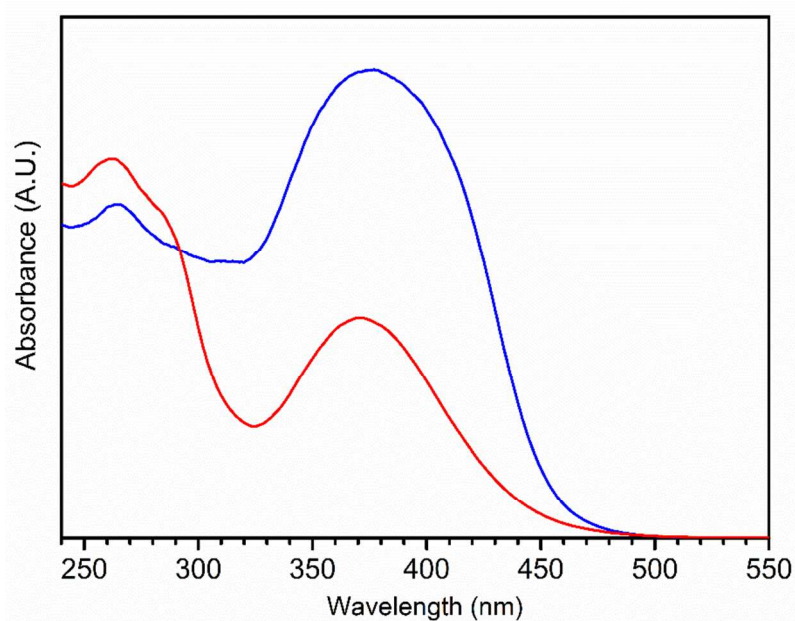

**Figure S4.** Diffuse reflectance UV-vis absorption spectra of NH<sub>2</sub>-MIL-125 (blue line; solvothetmal method, red line; reflux method)

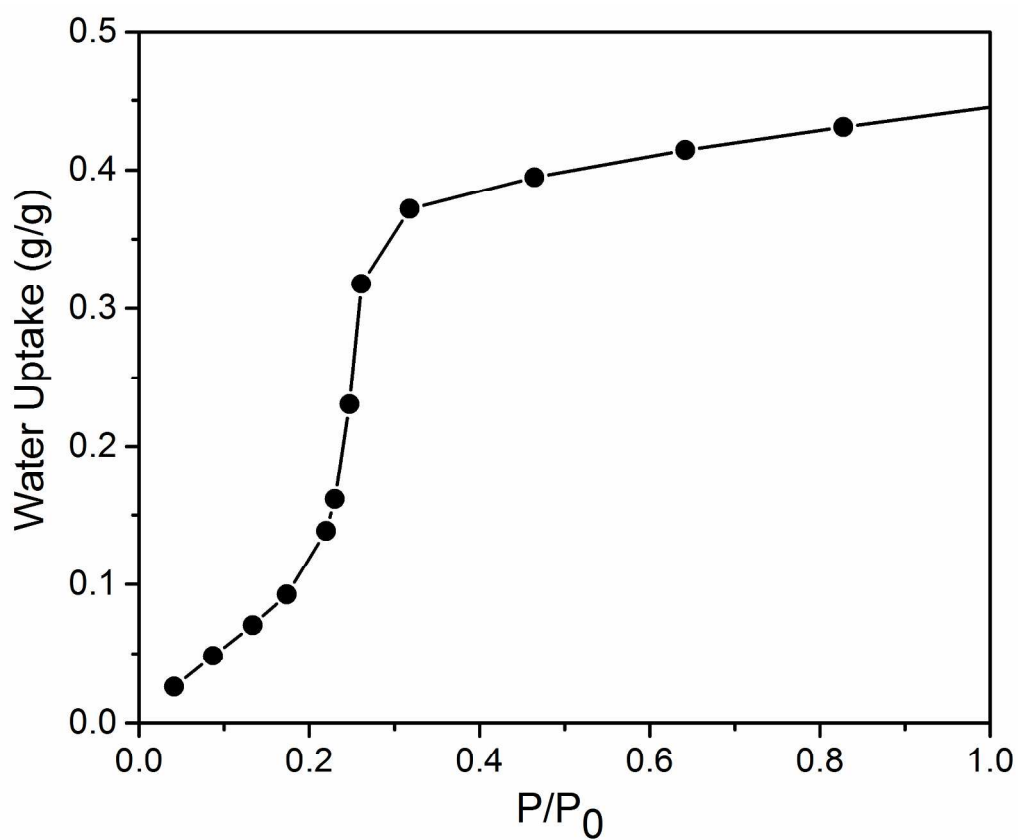

**Figure S5.** Water adsorption isotherm of Ti(*i*PrO)<sub>4</sub>-derived NH<sub>2</sub>-MIL-125 at 308.15

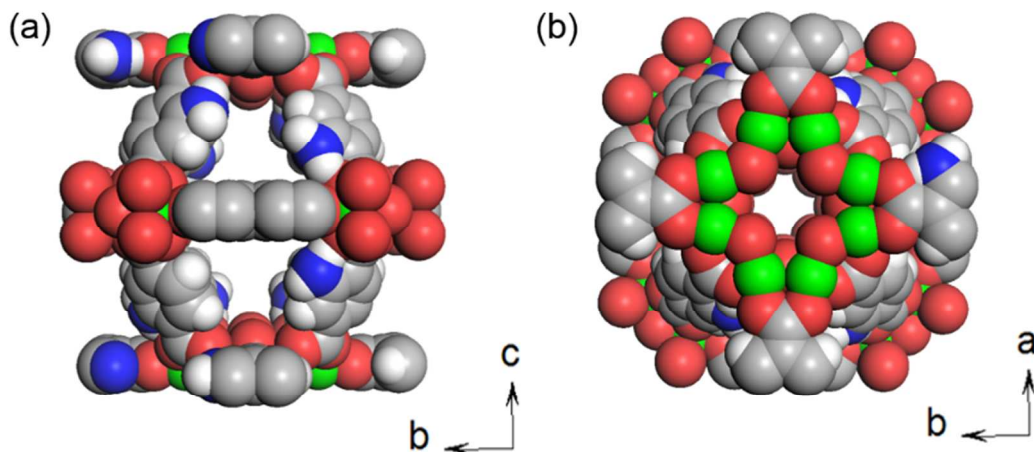

**Figure S6.** Space-filling models of  $\text{NH}_2\text{-MIL-125(Ti)}$  (a) along  $a$  axis and (b) along  $c$  axis.

#### Synthesis of MIL-125:

For the synthesis of MIL-125 by reflux reaction, BDC (3.85 g, 21.2 mmol) was dissolved in DMF (50 ml) by stirring it in a 500 ml round bottom flask under heating in an oil bath at 110 °C for 1 hour. Then, MeOH (14 ml) was dissolved in this solution under stirring for 1 hour under reflux condition while heating at 100 °C in the oil bath. Then,  $\text{Ti}(\text{BuO})_4$  (4.2ml) was also added into this solution and the new mixture solution was stirred for 72 hours while heating at 108 °C under reflux condition. After cooling to room temperature, the white crystalline product was collected by filtration. This product was twice washed with DMF to remove the excess unreacted ligand and then twice washed with MeOH to replace DMF with MeOH.

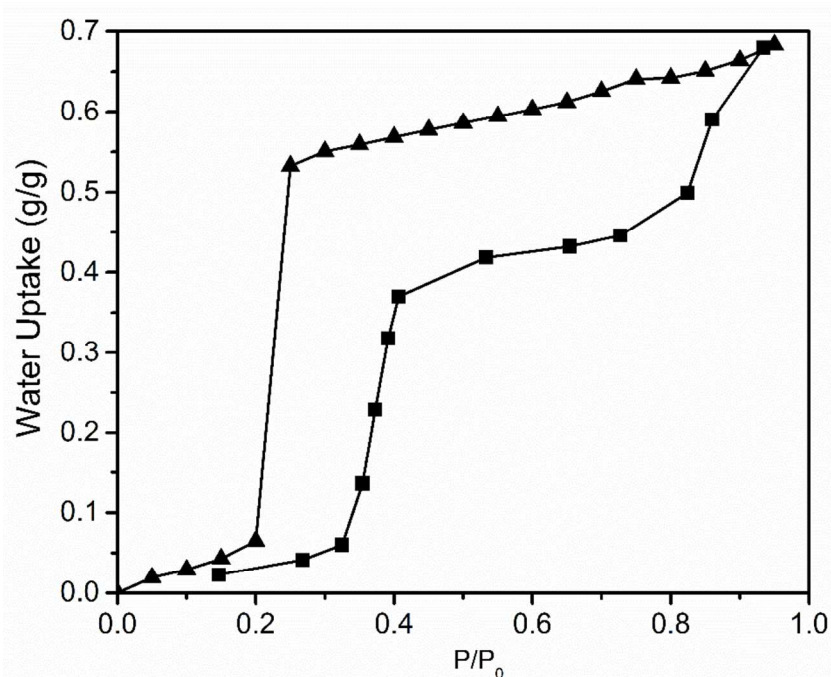

**Figure S7.** The water adsorption isotherms of  $\text{NH}_2\text{-MIL-125}$  (triangles) and  $\text{MIL-125}$  (squares) at 308.15 K

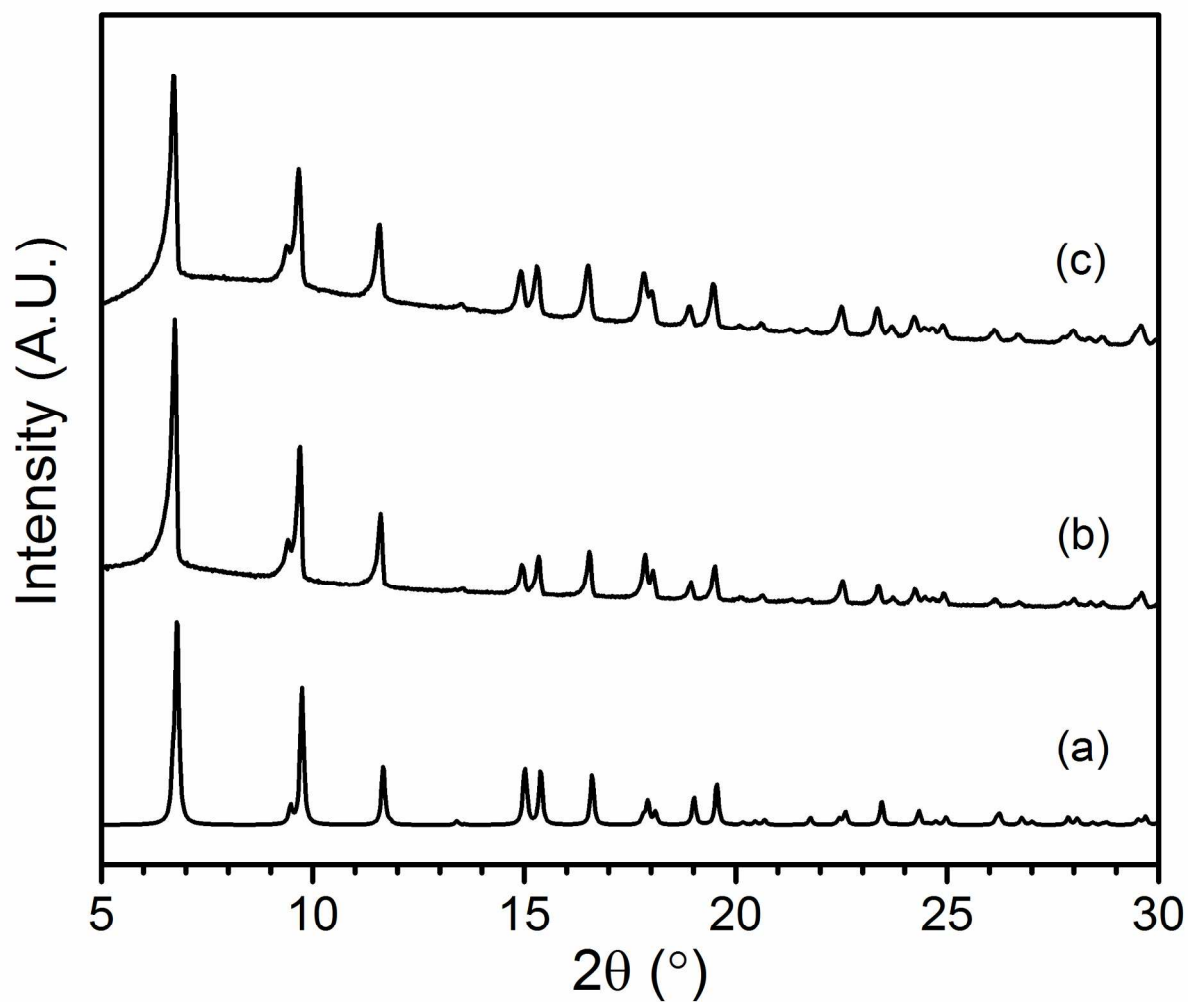

**Figure S8.** (a) Simulated PXRD profile, (b) experimental PXRD profiles of as-synthesized  $\text{NH}_2$ -MIL-125 and activated  $\text{NH}_2$ -MIL-125 after 10 water adsorption-desorption cycles

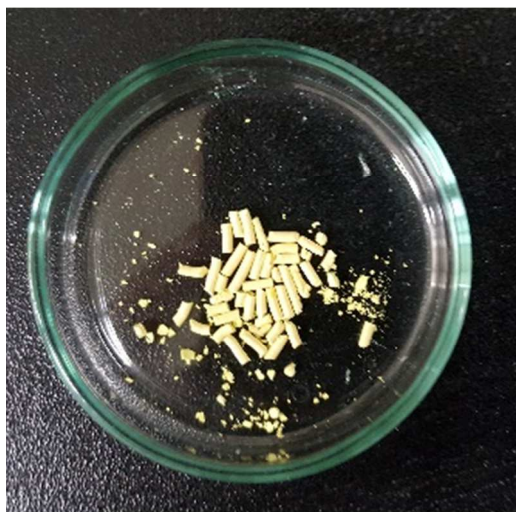

**Figure S9.** Optical image of  $\text{NH}_2$ -MIL-125 pellets



**Table S1.** Gas adsorption properties of the pellet

| NH <sub>2</sub> -MIL-125 | BET surface area (m <sup>2</sup> /g) | Total pore volume (cm <sup>3</sup> /g) at P/P <sub>0</sub> =0.990 | Micropore volume <sup>a</sup> (cm <sup>3</sup> /g) | Mesopore Volume <sup>b</sup> (cm <sup>3</sup> /g) |
|--------------------------|--------------------------------------|-------------------------------------------------------------------|----------------------------------------------------|---------------------------------------------------|
| 1% CMC                   | 955                                  | 0.4298                                                            | 0.3775                                             | 0.0282                                            |

<sup>a</sup> Determined by t-plot analysis.<sup>b</sup> Mesopore volume = Total pore volume – micropore volume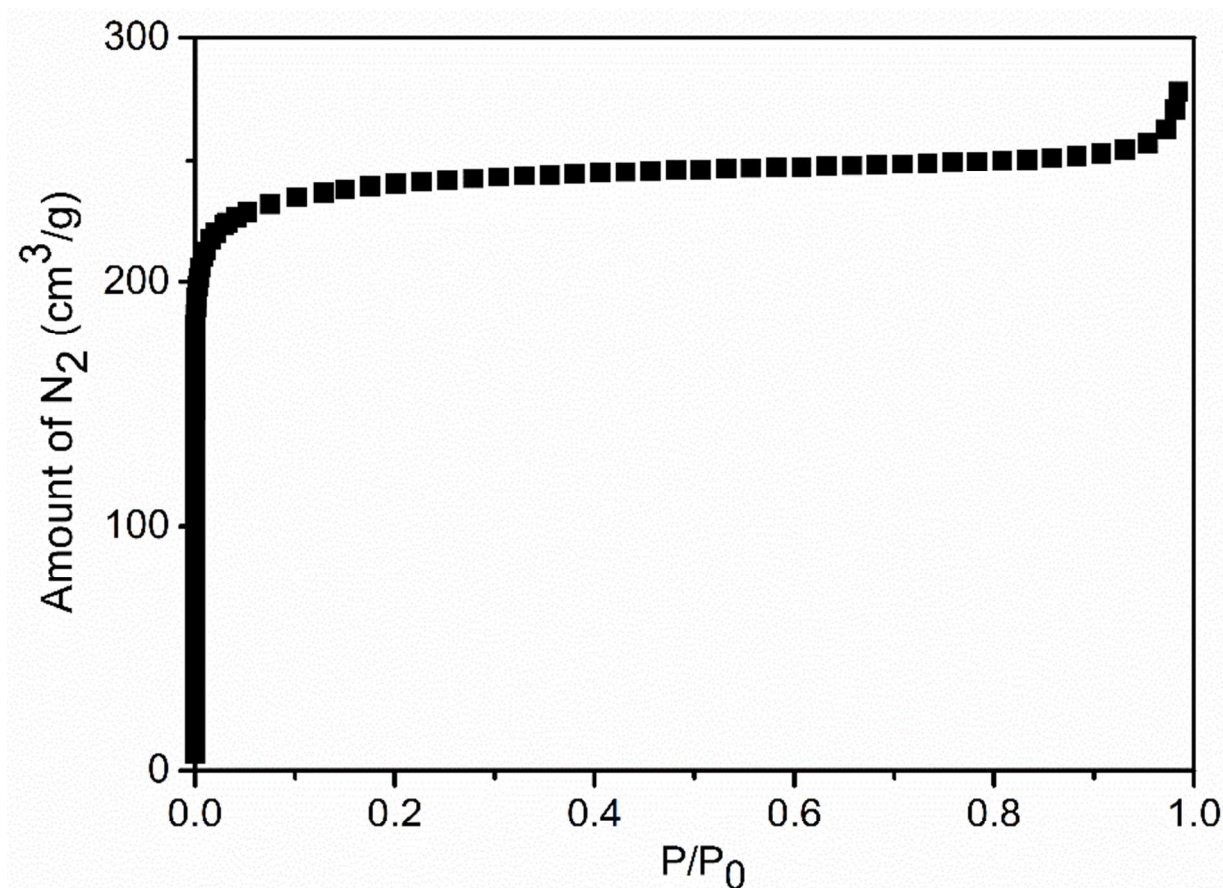**Figure S10.** The N<sub>2</sub> adsorption isotherm of NH<sub>2</sub>-MIL-125 pellet (NH<sub>2</sub>-MIL-125 and 1 wt% CMC) at 77 K

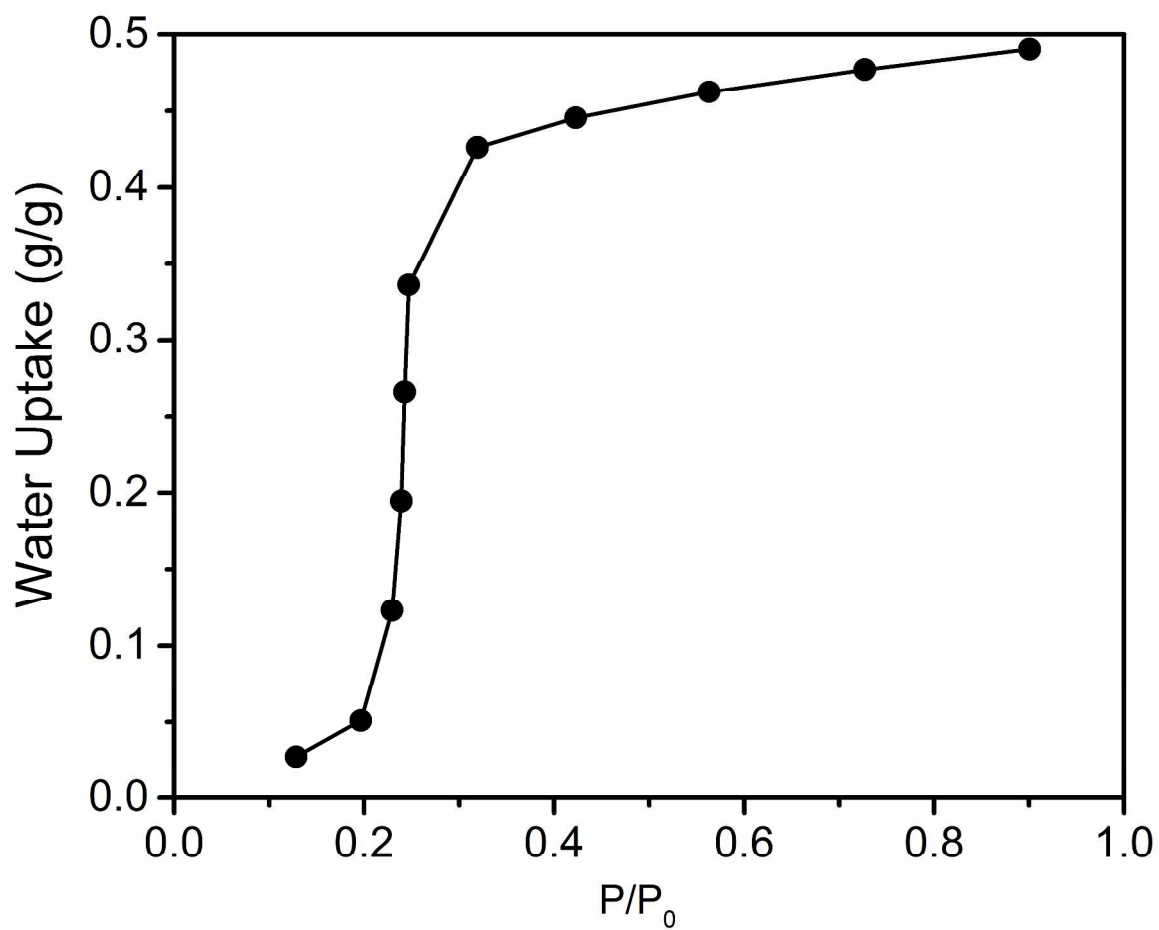

**Figure S11.** The water adsorption isotherm of NH<sub>2</sub>-MIL-125 pellet at 308.15 K
